# Supplementary material for: Diagnostic Classification for Human Autism and Obsessive-Compulsive Disorder Based on Machine Learning From a Primate Genetic Model
Source: Atypon-hosted journal article supplement (doi:10.1176/appi.ajp.2020.19101091), 2020-06-16
Supplement: appi.ajp.2020.19101091.ds001.pdf [file appi.ajp.2020.19101091.ds001.pdf]

1 **Supplementary material for**

2

3 **Diagnostic Classification for Human Autism and Obsessive-Compulsive Disorder**  
4 **Based on Machine Learning From a Primate Genetic Model**

5 Yafeng Zhan, M.S., Jianze Wei, M.S., Jian Liang, Ph.D., Xiu Xu, M.D., Ran He, Ph.D.,

6 Trevor W. Robbins, Ph.D., Zheng Wang, Ph.D.

7

8 \*Correspondence: [zheng.wang@ion.ac.cn](mailto:zheng.wang@ion.ac.cn) (Z. W.); [rhe@nlpr.ia.ac.cn](mailto:rhe@nlpr.ia.ac.cn) (R. H.)

9

10

11 **This PDF file includes:**

12 Materials and Methods

13 Supplementary References

14 Figure S1 to S5

15 Table S1-S10

16

# 1 **Materials and Methods**

## 2 **Animal preparation**

3 All experimental procedures for nonhuman primate research in this study were approved by the  
4 Institutional Animal Care and Use Committee in the Institute of Neuroscience and by the Biomedical  
5 Research Ethics Committee, Shanghai Institutes for Biological Sciences, Chinese Academy of  
6 Sciences, and conformed to National Institutes of Health guidelines for the humane care and use of  
7 laboratory animals.

8 The monkey dataset included five *MECP2*-duplication transgenic (TG) monkeys (*Macaca*  
9 *fascicularis*, aged  $4.40 \pm 0.29$  years (mean  $\pm$  SD), weight  $3.26 \pm 0.75$  kg; 2 male, 3 female) and 11  
10 wild-type (WT) monkeys (*Macaca fascicularis*, aged  $4.68 \pm 0.46$  years, weight  $3.97 \pm 1.36$  kg; 4 male,  
11 7 female). All 16 monkeys were prepared and maintained in a stable brain state for fMRI scans. The  
12 fMRI scanning process for all monkeys was conducted in a similar manner to our previous work (1,  
13 2). Before each scanning session, anesthesia of the animals was induced with an intramuscular  
14 injection of ketamine (10 mg per kg) and atropine sulfate (0.05 mg per kg). After intubation, animals  
15 were ventilated with an MRI-compatible ventilator (CWE Inc., Weston, Wisconsin). Macaques were  
16 maintained with intermittent positive-pressure ventilation to ensure a constant respiration rate (25-35  
17 breaths/min). Local anesthetic (5% lidocaine cream) was applied around the ears to block peripheral  
18 nerve stimulation. The monkeys were then placed in a custom-built MRI-compatible stereotaxic frame  
19 with their belly facing downward, and their heads were secured before being inserted into the center  
20 of AC88 bores.

21 In light of the anesthesiologist's instructions, anesthesia was maintained using the lowest possible

1 concentration of isoflurane gas. Isoflurane was selected for the scans as resting-state networks have  
2 previously been demonstrated to be present while using this agent (1, 3-5). The vital signs of animals  
3 including blood oxygenation, ECG, rectal temperature (Small Animal Instruments, Inc., Stony Brook,  
4 New York), respiration rate and end-tidal CO<sub>2</sub> (Smiths Medical ASD Inc., Dublin, Ohio) were  
5 continuously monitored throughout the duration of the experiment. Oxygen saturation was kept at over  
6 95% and body temperature was kept constant using a hot water blanket (Gaymar Industries Inc.,  
7 Orchard Park, New York). Lactated Ringer's solution was given with a maximum rate of 10 ml/kg/hour  
8 during the anesthesia process (6). Note that our intention was to equate the levels of physiological  
9 anesthesia across animals and not the level of anesthetic gas concentration. Slight individual  
10 differences in physiology meant that slight differences in anesthetic gas concentrations were needed  
11 to impose a similar level of anesthesia on different monkeys (7). Brain states were monitored by  
12 simultaneous MRI-compatible electroencephalograph (EEG) (Brain Products GmbH, Gilching,  
13 Germany) during data acquisition. Within the range of isoflurane levels used in the current study,  
14 consistent patterns of functional coupling between distant brain areas have been reported in prior  
15 monkey fMRI studies (5, 8) and demonstrated in our work as well (1, 2).

16

## 17 **Human Participants**

18 *Human ASD cohort.* We analyzed data from the ABIDE-I/II repository (9, 10) and an ADHD cohort  
19 from ADHD-200 (11), two publicly available multisite datasets of resting-state functional imaging data,  
20 and one OCD cohort from our institutional database. The ABIDE initiative now includes two large-  
21 scale collections: ABIDE-I and ABIDE-II. Each collection was created through the aggregation of

1 datasets independently collected across more than 17 international brain imaging laboratories (9, 10).  
2 In the present study, two cohorts of human ASD data were selected from ABIDE-I and ABIDE-II  
3 separately. We included all individuals with a diagnosis of either autism, Asperger syndrome, or  
4 pervasive developmental disorder not otherwise specified (PDD-NOS), collectively referred to as the  
5 ASD group according to the Diagnostic and Statistical Manual of Mental Disorders, Fourth Edition,  
6 Text Revision (*DSM-IV-TR*), as well as demographically matched healthy control (HC) subjects. As  
7 with other ABIDE studies (10, 12), participant inclusion criteria were as follows: (1) right-handedness;  
8 (2) a full-scale IQ (FIQ) score higher than 80; (3) ASD individuals with known current medication  
9 status; (4) a mean framewise displacement (FD) (13) of less than 0.2mm and the percent of frames or  
10 volumes with displacement greater than 0.2mm < 50%; (5) individuals with known eye status at scan  
11 (open/closed); (6) data with anatomical images providing near full brain coverage and successful  
12 registration; and (7) sites with at least 5 participants per group and matched number of participants  
13 between two groups after applying these inclusion criteria. This yielded data for 336 individuals (ASD  
14 = 133, male/female = 118/15, mean±SD age = 17.25±7.76 years; HCs = 203, male/female = 167/36,  
15 mean±SD age = 16.66±6.33 years) from 10 sites for ABIDE-I and 149 individuals (ASD = 60,  
16 male/female = 56/4, mean±SD age = 11.95±4.33 years; HCs = 89, male/female = 62/27, mean±SD  
17 age = 11.40±3.59 years) from 4 sites for ABIDE-II. More details of ASD samples are specified in Table  
18 S2 and S3.

19 *Human ADHD cohort.* The open-access, freely accessible Attention Deficit and Hyperactivity  
20 Disorder (ADHD-200 Sample) database ([http://fcon\\_1000.projects.nitrc.org/indi/adhd200/](http://fcon_1000.projects.nitrc.org/indi/adhd200/)) was used  
21 to obtain datasets with resting-state data of individuals with ADHD and healthy controls. In the present

1 study, the inclusion criteria included: (1) right-handedness; (2) an FIQ score higher than 80; (3) ADHD  
2 individuals with known current medication status; (4) individuals with images accepted after quality  
3 control. Individuals with translation or rotation in any axis of head motion larger than 3mm or 3° during  
4 scanning were excluded after applying the above inclusion criteria. These criteria led to the inclusion  
5 of data from the Kennedy Krieger Institute (“KKI”), Oregon Health & Science University (“OHSU”)  
6 and Peking (“Peking”) study-sites. Note that, for sites that contributed several functional runs per  
7 participant (OHSU), we only used the first functional run in the present study. Sites with less than 5  
8 participants per group and a mismatched number of participants between two groups after the above  
9 criteria applied were excluded. We selected ADHD participants with known current medication status  
10 and with images accepted after quality control. This yielded data for 275 individuals (ADHD = 102,  
11 male/female = 85/17, mean±SD = 11.57±2.23 years; HCs = 173, male/female = 99/74, mean±SD  
12 age= 10.96±1.81 years) for ADHD. More details of ADHD samples are specified in Table S4.

13 *Human OCD cohort.* Between April 2013 and September 2016, patients were recruited through  
14 local inpatient and outpatient departments at the OCD Clinics at Ruijin Hospital. All participants  
15 provided written informed consent for study participation after receiving a complete description of the  
16 protocols, which were approved by the Institutional Review Boards at Ruijin Hospital, Shanghai Jiao  
17 Tong University and by the Biomedical Research Ethics Committee, Shanghai Institutes for Biological  
18 Sciences, and Chinese Academy of Sciences. All patients had received a primary diagnosis of OCD  
19 based on clinical evaluation with the Chinese translation of the Structured Clinical Interview for *DSM-*  
20 *IV-TR*, and were administered the Yale-Brown Obsessive Compulsive Scale (Y-BOCS) (14) and  
21 Hamilton Anxiety Scale (HAM-A) to assess OCD symptom severity. Exclusion criteria were applied

1 as follows: (1) translation or rotation in any axis of head motion larger than 3mm or 3° during scanning;  
2 (2) any neurological disorders, psychosurgery, current or past substance abuse or dependence,  
3 pregnancy or any substantial physical illness such as brain tumor, brain injury, stroke, or epilepsy. The  
4 OCD dataset consisted of 171 individuals (OCD = 92, male/female = 55/37, mean±SD age =  
5 30.47±9.30 years; HCs = 79, male/female = 51/28, mean±SD age = 30.80±7.77 years). More details  
6 of OCD samples are specified in Table S5.

7

## 8 **Monkey MRI data acquisition and preprocessing**

9 MRI images of all monkeys were acquired at the Institute of Neuroscience on a 3T whole-body scanner  
10 (Trio; Siemens Healthcare, Erlangen, Germany) running with an enhanced gradient coil insert (AC88;  
11 80 mT/m maximum gradient strength, 800 mT/m/s maximum slew rate). A custom-built 8-channel  
12 phased-array transceiver coil was used for animal imaging sessions. Whole-brain resting-state fMRI  
13 data were collected using a gradient-echo echo-planar sequence (repetition time [TR] = 2000 ms; echo  
14 time [TE] = 29 ms; flip angle = 77°; slices = 32; matrix = 64 × 64; field of view = 96 × 96 mm; 1.5 ×  
15 1.5 mm<sup>2</sup> in plane resolution; slice thickness = 2.5 mm; GRAPPA factor = 2). For each session, 5 to 10  
16 runs were acquired and each run consisted of 200 functional volumes. A pair of gradient echo images  
17 (TE: 4.22 ms and 6.68 ms) with the same orientation and resolution as EPI images were acquired to  
18 generate a field map for distortion correction of EPI images. High-resolution T1-weighted anatomical  
19 images were acquired using a MPRAGE sequence (TR = 2500 ms; TE = 3.12 ms; inversion time =  
20 1100 ms; flip angle = 9°; acquisition voxel size = 0.5 × 0.5 × 0.5 mm<sup>3</sup>; 144 sagittal slices). Six whole-  
21 brain anatomical volumes were acquired and further averaged for better brain segmentation and 3D

1 cortical reconstruction. In the present experimental design, we did not intentionally collect different  
2 numbers of runs from each subject. In practice, however, the actual scan time for each experiment  
3 varied with the physiological status of different animals on that day, as is the case in most animal fMRI  
4 studies (5, 8, 15). In the final analysis, we included a total of 45 runs from TG and 99 runs from WT  
5 monkeys. Details of run numbers and physiological parameters for each animal are listed in Table S1.

6 Functional images of monkey and human brains were preprocessed using exactly the same strategy,  
7 which included slice timing correction, motion correction, coregistration with individual T1-weighted  
8 image, normalization to corresponding standard space, reslicing and spatial smoothing, regression of  
9 nuisance signals, removal of linear drift and temporal filtering (0.01 - 0.1 Hz). Specifically, the  
10 preprocessing of the monkey data were done using the SPM 8.0 toolbox  
11 (<http://www.fil.ion.ucl.ac.uk/spm>) and the FMRIB Software Library toolbox (FSL;  
12 <https://fsl.fmrib.ox.ac.uk/fsl>). The first 10 volumes were discarded. The field map images of each  
13 participant were then applied to compensate for the geometric distortion of EPI images caused by  
14 magnetic field inhomogeneity using FSL FUGUE. After slice timing correction and motion correction,  
15 the corrected images were normalized to standard space of the monkey F99 atlas  
16 ([http://sumsdb.wustl.edu/sums/macaque\\_more.do](http://sumsdb.wustl.edu/sums/macaque_more.do)) using an optimum 12-parameter affine  
17 transformation and nonlinear deformations, and then resampled to 2-mm cubic voxels and spatially  
18 smoothed with a 4 mm full-width at half-maximum (FWHM) isotropic Gaussian kernel. Six head  
19 motion parameters, ventricle and white matter signals were removed from the smoothed volumes using  
20 linear regression. Linear drift of the volumes was removed and a temporal filter was performed.

21

## 1 **Human MRI data acquisition and preprocessing**

2 Details available for ABIDE-I/II at [http://fcon\\_1000.projects.nitrc.org/indi/abide/](http://fcon_1000.projects.nitrc.org/indi/abide/) and ADHD-200 at  
3 [http://fcon\\_1000.projects.nitrc.org/indi/adhd200/](http://fcon_1000.projects.nitrc.org/indi/adhd200/). The imaging parameters of ASD and ADHD cohorts  
4 are listed in Table S6. OCD MRI data were collected using a Siemens Tim Trio 3T scanner (Erlangen,  
5 Germany). All participants underwent both functional and structural MRI scanning. Resting-state  
6 fMRI scans of the whole brain were acquired using a T2\*-weighted EPI (echo planar imaging)  
7 sequence: repetition time (TR) = 3000 ms; echo time (TE) = 30 ms; flip angle, 90°; 47 axial slices; 3  
8 mm slice thickness with no gap; and 300 volumes. High-resolution T1-weighted images used a  
9 magnetization prepared rapid gradient echo sequence: TR = 2300 ms; TE = 3 ms; inversion time, 1000  
10 ms; flip angle, 9°; 1×1×1 mm<sup>3</sup> spatial resolution. During the resting-state scan, participants were  
11 instructed to stay awake but relaxed, with their eyes closed, remain motionless, and refrain from  
12 thinking about anything in particular.

13 *ASD and ADHD data preprocessing.* The preprocessing of ABIDE-I was performed by the  
14 Preprocessed Connectomes Project (PCP, [http://preprocessed-connectomes-](http://preprocessed-connectomes-project.org/abide/index.html)  
15 [project.org/abide/index.html](http://preprocessed-connectomes-project.org/abide/index.html)) using the Data Processing Assistant for Resting-State fMRI (DPARSF)  
16 Toolbox (16). Preprocessing steps included slice timing correction, motion correction, spatial  
17 normalization into MNI space, reslicing to 3 × 3 × 3 mm voxels and smoothing with a Gaussian  
18 kernel (FWHM = 6 mm). Friston-24 parameters of head motion, white matter and ventricle signals  
19 were regressed out, followed by linear drift correction and temporal filtering (0.01 - 0.1 Hz). For more  
20 details, readers are suggested to refer to the description in the PCP ([http://preprocessed-connectomes-](http://preprocessed-connectomes-project.org/abide/dparsf.html)  
21 [project.org/abide/dparsf.html](http://preprocessed-connectomes-project.org/abide/dparsf.html)). The same preprocessing streamline was applied to the ABIDE-II and



1 ADHD data sets using DPARSF Toolbox.

2 *OCD data preprocessing.* Preprocessing for OCD data were the same as the ABIDE PCP pipeline  
3 using DPARSF Toolbox except for minimal differences in some parameters, a smaller smoothing  
4 kernel (i.e. 2 mm), six head-motion parameters were regressed, and temporal filtering was applied  
5 (0.01 - 0.08HZ) for OCD.

6

### 7 **Sparse linear regression model based on group lasso method**

8 We adopted the sparse linear regression model based on group lasso method penalty (17) to identify a  
9 subset of core brain regions relevant to ASD from *MECP2* monkeys.

10 Let  $\{(A^{(1)}, Y_1), \dots, (A^{(M)}, Y_M)\}$  be the  $M$  monkey sample of undirected adjacency matrices  
11 with  $N$  nodes and with their class labels  $y$ . The adjacency matrices  $A$  of each sample were reshaped  
12 into a one-dimensional vector and stacked, forming a feature matrix  $B \in \mathbb{R}^{M \times P}$  ( $M$  samples and  $P$   
13 features,  $P = N \times (N - 1)$ ). Let  $y = (Y_1, \dots, Y_M)$  denotes the  $M$  dimensional response vector (e.g. the  
14 diagnostic label, that is  $y = 1$  indicates TG and  $y = 0$  indicates WT class). The sparse linear  
15 regression model based on group lasso penalty can then be formulated as

$$16 \quad \min_{x \in \mathbb{R}^P} F(x) = \frac{1}{2} \left\| y - \sum_{n=1}^N [B]_n [x]_n \right\|_2^2 + \lambda \sum_{n=1}^N w_n \| [x]_n \|_2 \quad (1)$$

17 where  $\lambda$  is a positive regularization parameter with 100 equally spaced points between 0.05 and 1. In  
18 this setting, the original feature matrix  $B$  was partitioned into  $N$  groups (treating all edges connected  
19 to one node as a group)  $[B]_1, [B]_2, \dots, [B]_N$  and  $w_n$  denotes the weight for the  $n$ -th group. Note  
20 that, here we used screening rule proposed by Wang, Wonka (18) to solve group lasso efficiently. After

1 solving the group lasso problem, we obtained the corresponding  $N$  solution vector  
2  $[x]_1, [x]_2, \dots, [x]_N$  and the dimension of  $[x]_n$  is the same as the feature space in  $[B]_n$ . The relevant  
3 group features selected at each regularization parameter were combined by the union operation, to  
4 avoid the tweaking of such parameters.

## 6 **Cross-species diagnostic classification for human individuals**

7 The group lasso algorithm automatically and objectively identified 9 core regions from transgenic  
8 monkeys. The monkey sample (both transgenic and wild-type groups were under same anesthesia) was  
9 used solely for the extraction of core regions. We subsequently made a one-to-one mapping of the  
10 identified core regions to the human brain network to pre-selecting all edges that connected to the  
11 regions from in human correlation matrix, comprising 801 unique FCs. The final classifier was built  
12 on the human data and the actual classification was carried out in multiple, independent, large-scale  
13 human datasets. Specifically, the procedure for selecting relevant FCs from the pre-selected FCs (801  
14 FCs), training a predictive model, and assessing its generalization ability was carried out as a sequential  
15 process of 10×10 nested feature-selection (FS) and leave-one-out cross-validation (Figure S1). The  
16 details are shown below.

17 The whole data set was stratified into ten folds: one was left out as the testing pool for LOOCV, and  
18 the remaining 9 folds (outer loop training data) were used for constructing the optimal features.

### 19 *Inner feature selection loop:*

20 The outer loop training data was stratified into ten folds: one was left out, and the remaining 9  
21 folds (inner loop training data) were subject to lasso feature selection (19). . Optimal features were the

1 union of the functional connections (FCs) selected throughout the inner loop.

2 *Outer LOOCV predicting loop:*

3 In each LOOCV fold, one sample was taken from the testing pool of the outer loop and used as a  
4 test set for evaluation. The remaining samples were used to train a SLR classifier on optimal features  
5 retained during the inner training loop. This procedure is repeated for every sample in the testing pool  
6 of the outer loop.

7 The feature (FCs) selection procedure was similar to 10×10 nested cross-validation, with the  
8 difference that the test set was never used for validation or feature (FCs) selection. In this way, the  
9 lasso was trained on different subsamples of the data set, to increase the stability of the selected features.  
10 The ‘test set’ of the outer loop FS process was kept as a testing pool for LOOCV, whereas the ten folds  
11 of the inner loop FS were used to select features. Consequently, the LOOCV folds that belonged to the  
12 same testing pool of the outer loop FS shared the same reduced features. In the inner loop FS, the FS  
13 was completed using MATLAB’s *Statistics and regression Toolbox* (Mathworks Inc.). FCs were  
14 selected using the default setting of the *lasso* function. The hyperparameter  $\lambda$  was estimated default by  
15 *lasso*. The features selected at each inner fold and  $\lambda$  were combined by the union operation, to include  
16 features that are important for any possible subsample (inner ten folds) of the training data set. Once  
17 the inner loop FS was executed, one sample was taken from the testing pool of the outer loop FS, and  
18 used as the test set of the LOOCV. The remaining samples were used to train SLR on the FCs retained  
19 during the inner loop FS (as illustrated in Figure S1).

20

## 1 Sparse logistic regression classifier

2 To predict the diagnostic label from the extracted features (optimal FCs,  $z$ ), we employed logistic  
3 regression as the classifier. In logistic regression, a logistic function is used to define the probability  
4 of a participant belonging to the ASD class as

$$5 \quad P(y = 1 \mid \hat{z}; w) = \frac{1}{1 + \exp(-w^T \hat{z})} \quad (2)$$

6 where  $y$  represents the diagnosis class label, that is  $y = 1$  indicates ASD and  $y = 0$  indicates HC  
7 class, respectively.  $\hat{z} = [z^T, 1]^T \in \mathbb{R}^{k+1}$  is a feature vector with an augmented input.  $w \in \mathbb{R}^{k+1}$  is the  
8 weight vector of the logistic function. SLR automatically selects the features related to the ASD label  
9 as input for the logistic function. In SLR, the probability distribution of the parameter vector is  
10 estimated using the hierarchical Bayesian estimation approach, in which the prior distribution of each  
11 element of the parameter vector is represented as a Gaussian distribution. Because of the automatic  
12 relevance determination property of the hierarchical Bayesian estimation method, some of the  
13 Gaussian distributions become sharply peaked at zero so that the irrelevant features are not used in the  
14 classification (20).

15

## 16 Model Validation and Comparison

17 To test model robustness, a non-parametric permutation test was performed to determine whether the  
18 classification accuracy was due to chance. The entire classification analysis was repeated 5,000 times  
19 with random shuffling of the human group labels using the set of 9 core regions identified from the  
20 monkey cohort. This procedure estimated the null distribution of classification accuracy, and the  
21 significant  $p$  value was estimated by identifying the proportion of the total number for which the  
22 classification accuracy was greater than that of the observed one. Moreover, the reliability of the  
23 proposed cross-species translational framework was further tested under conditions where 9 core

1 regions were randomly selected from the 94 regions to evaluate whether the probability of getting  
2 accuracy values was significantly higher than chance level ( $n = 5,000$  iterations). For model  
3 comparison, we compared the predictive accuracies of two classification models, i.e. the monkey-  
4 derived classifier and the human-derived classifier, using McNemar's test (21). Specifically, the  
5 monkey-derived classifier was constructed based on core regions identified from monkey data, the  
6 human-derived classifier was constructed based on core regions identified from human ASD cohort.

7

8

## 1 **References**

- 2 1. Wang Z, Chen LM, Negyessy L, et al.: The relationship of anatomical and functional connectivity  
3 to resting-state connectivity in primate somatosensory cortex. *Neuron* 2013; 78:1116-1126.
- 4 2. Lv Q, Yang L, Li G, et al.: Large-Scale Persistent Network Reconfiguration Induced by Ketamine  
5 in Anesthetized Monkeys: Relevance to Mood Disorders. *Biol Psychiatry* 2016; 79:765-775.
- 6 3. Shen K, Bezgin G, Hutchison RM, et al.: Information processing architecture of functionally  
7 defined clusters in the macaque cortex. *J Neurosci* 2012; 32:17465-17476.
- 8 4. Hutchison RM, Womelsdorf T, Gati JS, et al.: Resting-state networks show dynamic functional  
9 connectivity in awake humans and anesthetized macaques. *Hum Brain Mapp* 2013; 34:2154-2177.
- 10 5. Vincent JL, Patel GH, Fox MD, et al.: Intrinsic functional architecture in the anaesthetized monkey  
11 brain. *Nature* 2007; 447:83-86.
- 12 6. Logothetis NK, Guggenberger H, Peled S, et al.: Functional imaging of the monkey brain. *Nat*  
13 *Neurosci* 1999; 2:555-562.
- 14 7. Sallet J, Mars RB, Noonan MP, et al.: The organization of dorsal frontal cortex in humans and  
15 macaques. *J Neurosci* 2013; 33:12255-12274.
- 16 8. Hutchison RM, Hutchison M, Manning KY, et al.: Isoflurane induces dose-dependent alterations  
17 in the cortical connectivity profiles and dynamic properties of the brain's functional architecture. *Hum*  
18 *Brain Mapp* 2014; 35:5754-5775.
- 19 9. Di Martino A, O'Connor D, Chen B, et al.: Enhancing studies of the connectome in autism using  
20 the autism brain imaging data exchange II. *Sci Data* 2017; 4:170010.
- 21 10. Di Martino A, Yan CG, Li Q, et al.: The autism brain imaging data exchange: towards a large-  
22 scale evaluation of the intrinsic brain architecture in autism. *Mol Psychiatry* 2014; 19:659-667.
- 23 11. Consortium HD: The ADHD-200 Consortium: A Model to Advance the Translational Potential  
24 of Neuroimaging in Clinical Neuroscience. *Front Syst Neurosci* 2012; 6:62.
- 25 12. Catani M, Dell'Acqua F, Budisavljevic S, et al.: Frontal networks in adults with autism spectrum  
26 disorder. *Brain* 2016; 139:616-630.
- 27 13. Power JD, Barnes KA, Snyder AZ, et al.: Spurious but systematic correlations in functional  
28 connectivity MRI networks arise from subject motion. *Neuroimage* 2012; 59:2142-2154.
- 29 14. Goodman WK, Price LH, Rasmussen SA, et al.: The Yale-Brown Obsessive Compulsive Scale.  
30 I. Development, use, and reliability. *Arch Gen Psychiatry* 1989; 46:1006-1011.
- 31 15. Hutchison RM, Everling S: Monkey in the middle: why non-human primates are needed to bridge  
32 the gap in resting-state investigations. *Front Neuroanat* 2012; 6:29.
- 33 16. Chao-Gan Y, Yu-Feng Z: DPARSF: A MATLAB Toolbox for "Pipeline" Data Analysis of Resting-  
34 State fMRI. *Front Syst Neurosci* 2010; 4:13.
- 35 17. Yuan M, Lin Y: Model selection and estimation in regression with grouped variables. *J Roy Stat*  
36 *Soc B* 2006; 68:49-67.
- 37 18. Wang J, Wonka P, Ye JP: Lasso screening rules via dual polytope projection. *J Mach Learn Res*  
38 2015; 16:1063-1101.
- 39 19. Tibshirani R: Regression shrinkage and selection via the Lasso. *J Roy Stat Soc B Met* 1996;  
40 58:267-288.
- 41 20. Yamashita O, Sato MA, Yoshioka T, et al.: Sparse estimation automatically selects voxels relevant

- 1 for the decoding of fMRI activity patterns. *Neuroimage* 2008; 42:1414-1429.
- 2 21. McNemar Q: Note on the Sampling Error of the Difference between Correlated Proportions or
- 3 Percentages. *Psychometrika* 1947; 12:153-157.

4

# 1 Supplementary Figures

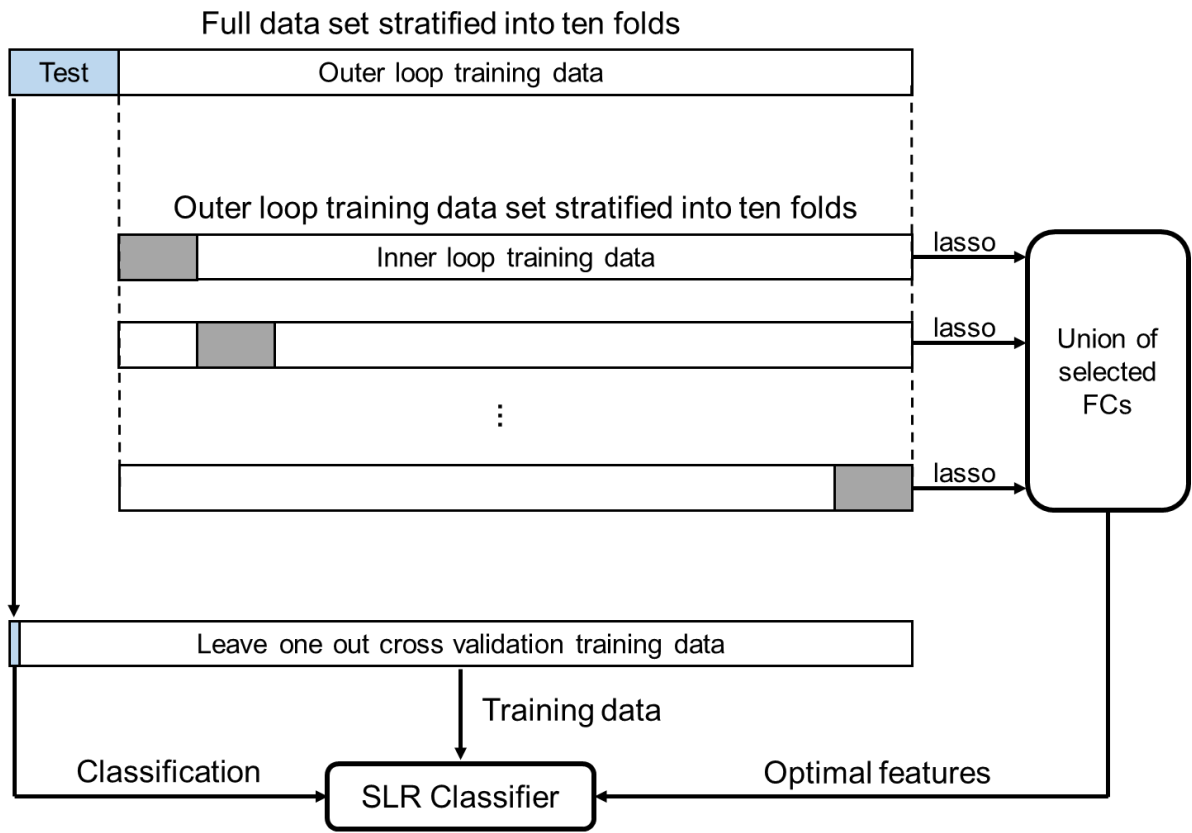

2

3 **Figure S1. Illustration of nested 10×10 feature selection and leave-one-out cross-validation.**

4 I. The full data set was stratified into ten folds: one was left out as the testing pool for LOOCV, and  
 5 the remaining 9 folds (outer loop training data) were used for constructing the optimal features.

6 II. In the inner loop, the outer loop training data was stratified into ten folds, one was first left out, and  
 7 the remaining 9 folds (inner loop training data) were subjected to lasso feature selection. Optimal  
 8 features were the union of the functional connections (FCs) selected throughout the inner loop.

9 III. In each LOOCV fold, one sample was taken from the testing pool of the outer loop and used as  
 10 test set for LOOCV evaluation. The remaining samples are used to train SLR on optimal features



- 1 retained during the inner loop. This procedure is repeated for every sample in the testing pool of the
- 2 outer loop.

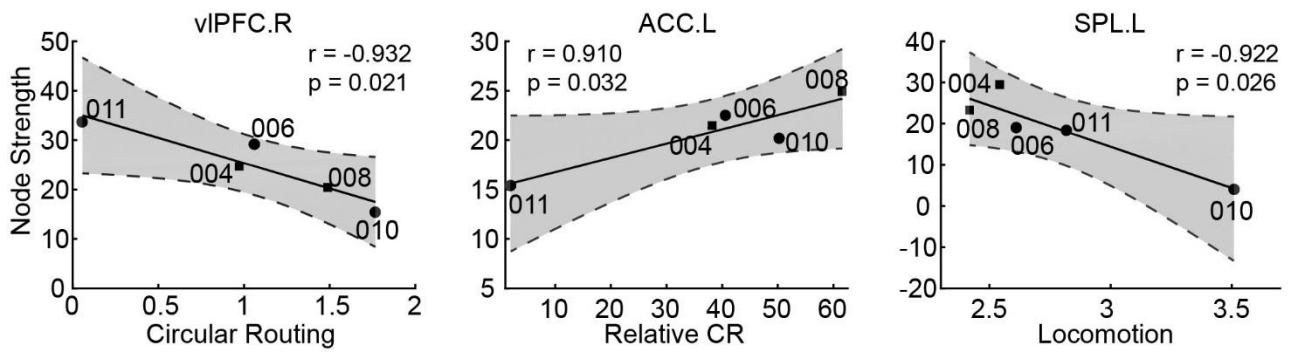

1

2 **Figure S2. Correlation between node strength of core regions and behavior abnormalities in TG**  
 3 **group.**

4 A circle shape denotes female and a square shape denotes male, with labels indicating monkey ID.

5 Gray zone indicates a 95% confidence interval. vIPFC.R, right ventrolateral prefrontal cortex; ACC.L,

6 left anterior cingulate cortex; SPL.L, left superior parietal cortex; CR, circular routing.

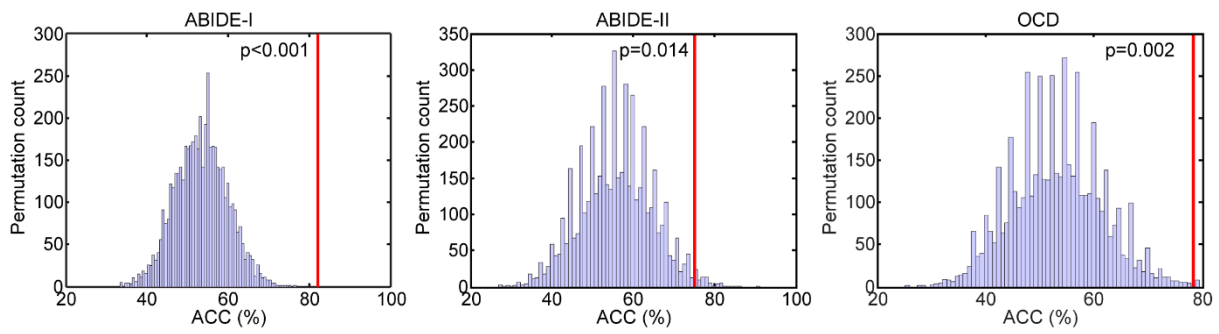

1

2 **Figure S3. Null distribution of classification accuracy in the permutation test.**

3 The histograms of the permutation test (5,000 repetitions) for ASD (ABIDE-I and ABIDE-II)

4 and OCD data. The purple bars represent the number of permutation counts at each level of

5 accuracy. The vertical red lines denote the observed accuracies, corresponding to a p-value of

6  $p < 0.001$  for ABIDE-I,  $p = 0.014$  for ABIDE-II, and  $p = 0.002$  for OCD.

7

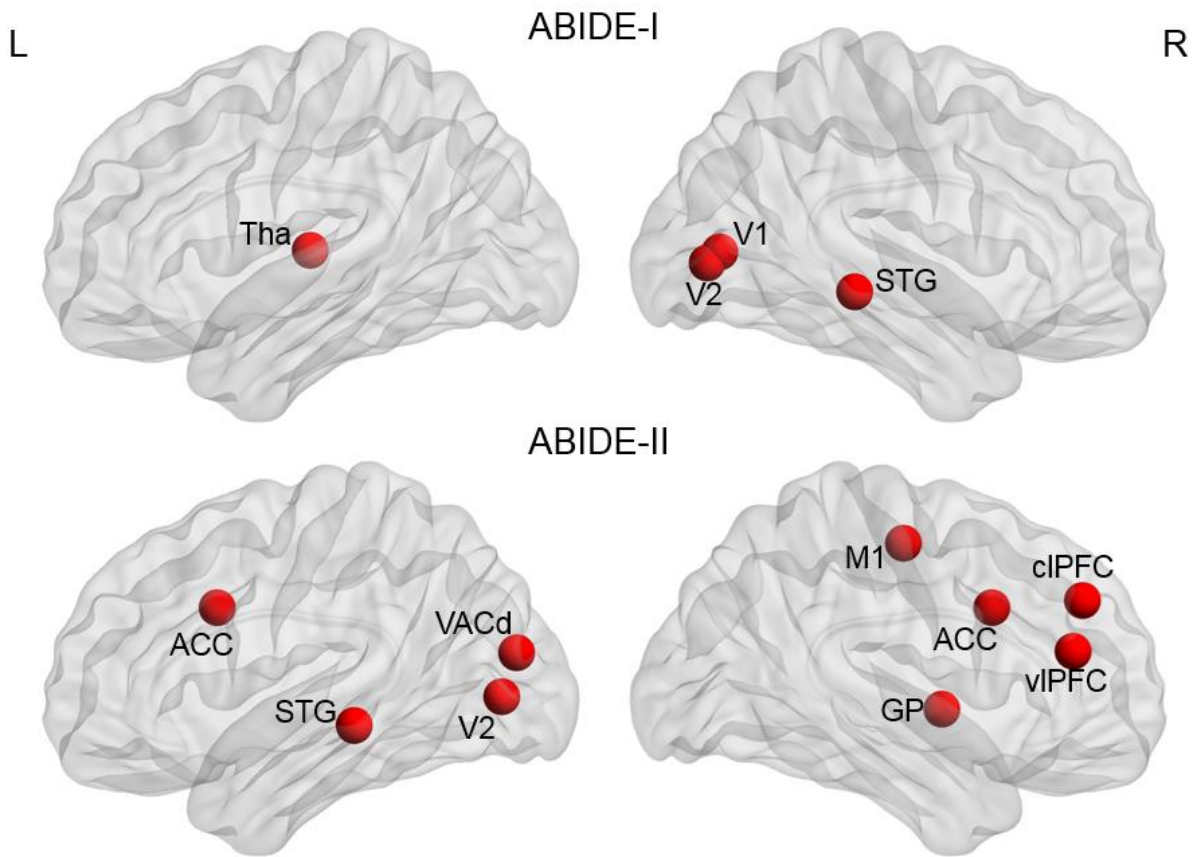

1

2 **Figure S4. Identified core regions using ABIDE-I and ABIDE-II datasets.**

3 Core regions identified by group lasso in ABIDE-I and ABIDE-II cohorts. Tha, thalamus; V1,  
 4 primary visual cortex; V2, secondary visual cortex; STG, superior temporal cortex; ACC,  
 5 anterior cingulate cortex; VACd, dorsal part of the anterior visual area; M1, primary motor  
 6 cortex; GP, globus pallidus; cIPFC, centrolateral prefrontal cortex; vIPFC, ventrolateral  
 7 prefrontal cortex.

8

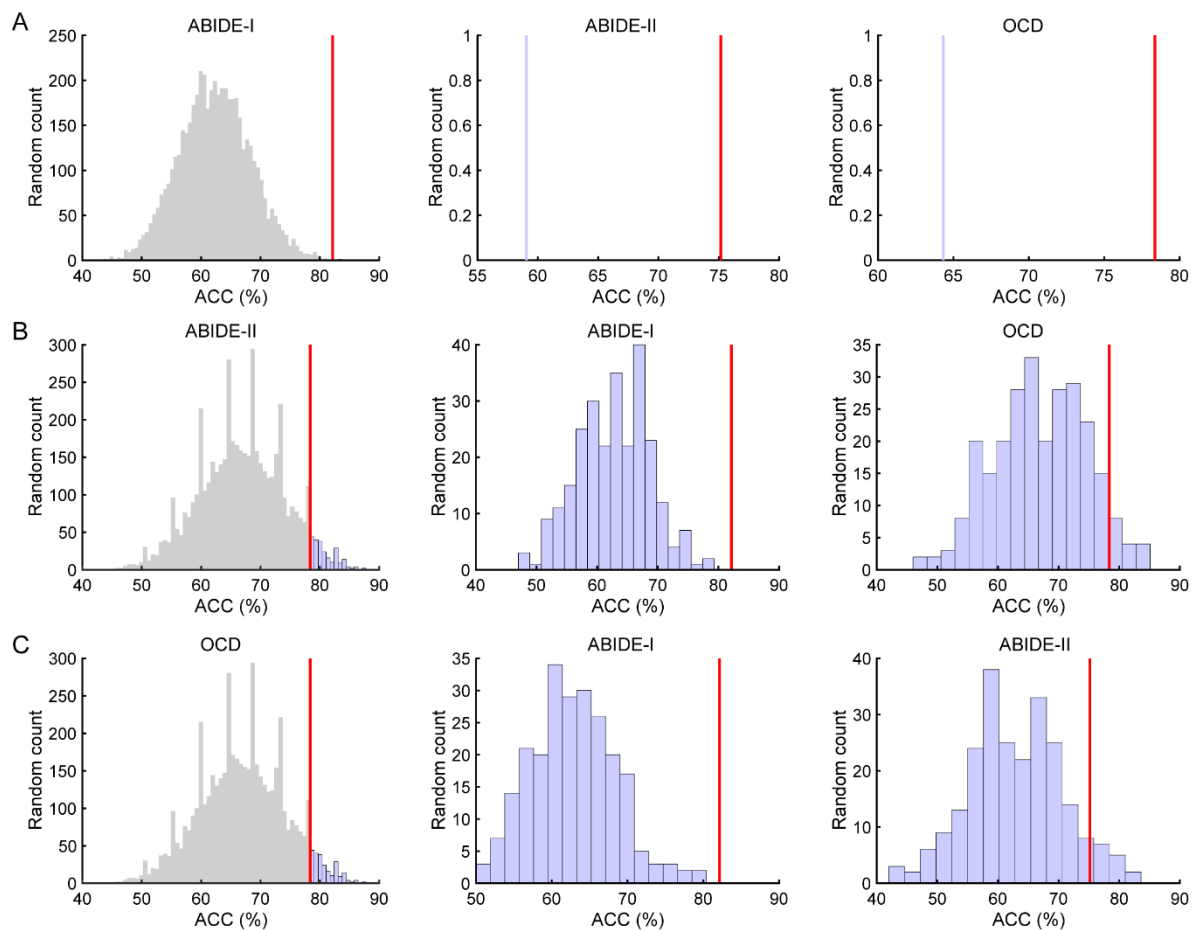

1

2 **Figure S5. Plots depicting the poor generalizability of random selections of 9 core regions**  
 3 **in different cohorts.**

4 The left column shows the accuracy histograms of 9 core regions that were randomly selected  
 5 5,000 times in each dataset. Purple bars on the right side of the vertical red line denote cases  
 6 with higher accuracy than the present monkey-derived classifier. Middle and right columns  
 7 show the accuracy of these cases compared to the monkey-derived classifier in the other two  
 8 datasets.

9

# 1 Supplementary Tables

2 **Table S1. Characteristics of all TG and WT monkeys.**

|                 | ID                | Gender | Copy number                                   | Weight (kg) | Age (year) | Heart rate (beat/min) | EtCO <sub>2</sub> (mmHg) | Temp. (°C) | Isoflurane (%) | Run |
|-----------------|-------------------|--------|-----------------------------------------------|-------------|------------|-----------------------|--------------------------|------------|----------------|-----|
| TG              | TG04              | M      | 1.0                                           | 4.3         | 4.9        | ~115                  | ~29                      | ~37.0      | 1.0            | 9   |
|                 | TG06              | F      | 7.3                                           | 2.7         | 4.3        | ~103                  | ~24                      | ~35.6      | 1.0            | 8   |
|                 | TG08              | M      | 2.9                                           | 3.8         | 4.2        | ~125                  | ~29                      | ~36.1      | 1.0            | 7   |
|                 | TG10              | F      | 1.1                                           | 2.6         | 4.2        | ~94                   | ~26                      | ~35.8      | 1.0            | 8   |
|                 | TG11              | F      | 1.9                                           | 2.9         | 4.4        | ~130                  | ~27                      | ~36.8      | 1.2            | 13  |
|                 | 2M3F              |        | 3.26±0.75 <sup>a</sup> 4.40±0.29 <sup>a</sup> |             |            |                       |                          |            |                | 45  |
| WT              | WT030             | F      | -                                             | 3.5         | 4.8        | ~148                  | ~27                      | ~37.7      | 0.8            | 8   |
|                 | WT032             | M      | -                                             | 3.9         | 4.4        | ~120                  | ~30                      | ~37.7      | 1.0            | 10  |
|                 | WT034             | M      | -                                             | 3.5         | 4.4        | ~120                  | ~30                      | ~37.0      | 1.0            | 7   |
|                 | WT139             | M      | -                                             | 7           | 5.5        | ~148                  | ~27                      | ~37.2      | 1.2            | 10  |
|                 | WT278             | F      | -                                             | 3.4         | 4.5        | ~125                  | ~28                      | ~35.6      | 1.2-1.25       | 10  |
|                 | WT330             | F      | -                                             | 4.3         | 4.6        | ~125                  | ~27                      | ~35.9      | 1.2-1.3        | 10  |
|                 | WT358             | F      | -                                             | 3.2         | 4.2        | ~130                  | ~28                      | ~37.8      | 1.25-1.3       | 10  |
|                 | WT362             | F      | -                                             | 3           | 4.5        | ~130                  | ~27                      | ~36.1      | 1.2            | 10  |
|                 | WT463             | M      | -                                             | 6.1         | 5.1        | ~110                  | ~27                      | ~37.2      | 1.3-1.2        | 5   |
|                 | WT490             | F      | -                                             | 2.9         | 4.1        | ~136                  | ~30                      | ~37.1      | 1.1            | 9   |
|                 | WT490             | F      | -                                             | 2.9         | 5.4        | ~159                  | ~27                      | ~37.0      | 1.2            | 10  |
|                 | 4M7F              |        | 3.97±1.36 <sup>a</sup> 4.68±0.46 <sup>a</sup> |             |            |                       |                          |            |                | 99  |
| <i>P</i> -value | 0.89 <sup>b</sup> |        | 0.233 <sup>c</sup>                            |             |            |                       |                          |            |                |     |

3 Abbreviations. EtCO<sub>2</sub>, end tidal of CO<sub>2</sub>; Temp., rectal temperature; TG, transgenic; WT, wild-  
4 type.

5 <sup>a</sup>, mean ± SD; <sup>b</sup>,  $\chi^2$  test; <sup>c</sup>, two sample student's t-test with two tails.

6

1 **Table S2. Characteristics of human ABIDE-I cohorts.**

| Site     | Number |     | Autism/Asperger<br>r/PDD-NOS | Age, mean±SD [Range]        |                              |                       | Gender (M/F) |        |                       | FIQ, mean±SD [Range]           |                                 |                       |
|----------|--------|-----|------------------------------|-----------------------------|------------------------------|-----------------------|--------------|--------|-----------------------|--------------------------------|---------------------------------|-----------------------|
|          | HC     | ASD |                              | HC                          | ASD                          | <i>p</i> <sup>a</sup> | HC           | ASD    | <i>p</i> <sup>b</sup> | HC                             | ASD                             | <i>p</i> <sup>a</sup> |
| KKI      | 21     | 5   | 1/4/0                        | 10.10±1.15<br>[8.39 12.77]  | 9.87±1.52)<br>[8.09 11.37]   | .701                  | 14/7         | 4/1    | .562                  | 113.14±9.54<br>[98.00 125.00]  | 98.60±15.29<br>[84.00 120.00]   | .012                  |
| LEUVEN_1 | 14     | 13  | 13/0/0                       | 23.36±3.00<br>[18.00 29.00] | 21.77±4.27<br>[18.00 32.00]  | .271                  | 14/0         | 13/0   | --                    | 113.43±12.15<br>[98.00 146.00] | 108.00±12.44<br>[89.00 128.00]  | .262                  |
| MAX_MUN  | 24     | 12  | 0/12/0                       | 25.92±8.32<br>[7.00 46.00]  | 32.08±14.46<br>[11.00 58.00] | .112                  | 23/1         | 10/2   | .201                  | 112.13±9.78<br>[95.00 129.00]  | 114.67±12.62<br>[93.00 133.00]  | .509                  |
| PITT     | 20     | 18  | 18/0/0                       | 18.87±6.51<br>[11.81 33.24] | 19.07±7.22<br>[11.40 33.86]  | .928                  | 17/3         | 14/4   | .566                  | 110.15±9.10<br>[97.00 130.00]  | 114.00±12.08<br>[96.00 131.00]  | .272                  |
| SDSU     | 16     | 7   | 1/6/0                        | 13.98±1.94<br>[8.67 16.88]  | 15.31±1.89<br>[12.13 17.15]  | .143                  | 10/6         | 7/0    | .059                  | 106.94±10.99<br>[88.00 123.00] | 122.71±12.45<br>[112.00 141.00] | .006                  |
| TRINITY  | 23     | 19  | 7/6/6                        | 17.48±3.66<br>[12.04 25.66] | 16.63±3.02<br>[12.00 23.08]  | .424                  | 23/0         | 19/0   | --                    | 110.65±12.15<br>[89.00 133.00] | 110.63±14.10<br>[89.00 135.00]  | .996                  |
| UCLA_1   | 25     | 24  | 24/0/0                       | 13.55±1.99<br>[9.50 17.79]  | 13.48±2.72<br>[8.49 17.94]   | .914                  | 21/4         | 22/2   | .413                  | 104.12±9.69<br>[84.00 126.00]  | 104.96±12.19<br>[86.00 132.00]  | .791                  |
| UCLA_2   | 9      | 7   | 7/0/0                        | 12.23±1.14<br>[9.79 13.63]  | 12.68±1.99<br>[10.57 16.47]  | .576                  | 7/2          | 7/0    | .182                  | 112.44±10.36<br>[99.00 128.00] | 94.71±11.63<br>[86.00 118.00]   | .006                  |
| UM_1     | 34     | 18  | 14/3/1                       | 14.02±3.14<br>[9.50 19.20]  | 13.60±2.44<br>[9.70 18.60]   | .621                  | 22/12        | 13/5   | .583                  | 109.34±9.64<br>[89.00 127.50]  | 107.81±12.32<br>[89.50 135.00]  | .623                  |
| UM_2     | 17     | 10  | 8/2/0                        | 17.14±4.27<br>[13.60 28.80] | 15.28±1.49<br>[13.10 17.40]  | .198                  | 16/1         | 9/1    | .693                  | 109.88±10.10<br>[89.50 129.00] | 113.25±14.73<br>[90.50 133.50]  | .487                  |
| Total    | 203    | 133 | 93/33/7                      | 16.66±6.33<br>[7.00 46.00]  | 17.25±7.76<br>[8.09 8.09]    | .447                  | 167/36       | 118/15 | .107                  | 109.92±10.43<br>[84.00 146.00] | 109.33±13.78<br>[84.00 141.00]  | .655                  |

2

1 Table S2 continued.

| Site               | ADOS, mean±SD [Range]      |                          |                           |                          |
|--------------------|----------------------------|--------------------------|---------------------------|--------------------------|
|                    | ADOS_TOTAL                 | ADOS_COMM                | ADOS_SOCIAL               | ADOS_STEREO              |
| KKI                | 12.20±3.19<br>[8.00 16.00] | 3.20±0.84<br>[2.00 4.00] | 9.00±2.74<br>[6.00 13.00] | 3.40±2.30<br>[0.00 6.00] |
| LEUVEN_1           | --                         | --                       | --                        | --                       |
| MAX_MUN            | --                         | --                       | --                        | --                       |
| PITT               | 12.50±3.71<br>[7.00 19.00] | 4.19±1.33<br>[2.00 7.00] | 8.31±2.73<br>[5.00 12.00] | 2.08±1.55<br>[0.00 6.00] |
| SDSU               | --                         | --                       | --                        | --                       |
| TRINITY            | --                         | --                       | --                        | --                       |
| UCLA_1             | 10.42±4.21<br>[2.00 17.00] | 3.25±1.65<br>[0.00 6.00] | 7.17±2.87<br>[2.00 11.00] | 1.33±1.69<br>[0.00 7.00] |
| UCLA_2             | 13.50±2.81<br>[9.00 16.00] | 3.67±1.51<br>[1.00 5.00] | 9.83±1.60<br>[8.00 12.00] | 3.00±1.79<br>[1.00 6.00] |
| UM_1               | --                         | --                       | --                        | --                       |
| UM_2               | --                         | --                       | --                        | --                       |
| Total <sup>c</sup> | 11.61±3.91<br>[2.00 19.00] | 3.59±1.50<br>[0.00 7.00] | 8.02±2.78<br>[2.00 13.00] | 1.96±1.83<br>[0.00 7.00] |

- 2 Abbreviations. TDC, typically developing control; ADOS, Autism Diagnostic Observation Schedule; ADOS\_TOTAL, classic total ADOS score;
- 3 ADOS\_COMM, communication total sub-score of the classic ADOS; ADOS\_SOCIAL, social total score of the classic ADOS; ADOS\_STEREO,
- 4 stereotyped behaviors and restricted interests total sub-score of the classic ADOS. KKI, Kennedy Krieger Institute; LEUVEN\_1, University of Leuven:
- 5 Sample 1; MAX\_MUN, Ludwig Maximilians University Munich; PITT, University of Pittsburgh School of Medicine; SDSU, San Diego State University;



1 TRINITY, Trinity Centre for Health Sciences; UCLA\_1, University of California Los Angeles: Sample 1; UCLA\_2, University of California Los Angeles:  
2 Sample 2; UM\_1, University of Michigan: Sample 1; UM\_2, University of Michigan: Sample 2.  
3 a, two sample Student's *t*-test with two tails; b,  $\chi^2$  test; c, 51 of 126 ASD subjects have ADOS\_TOTAL, ADOS\_COMM, ADOS\_SOCAIL data available  
4 and 48 for ADOS\_STRERO; "--" indicates data unavailable.  
5

1 **Table S3. Characteristics of human ABIDE-II cohorts.**

| Site   | Number |     | Autism/Asperger/PDD-NOS | Age, mean±SD [Range]        |                             |                       | Gender (M/F) |      |                       | FIQ, mean±SD [Range]           |                                |                       |
|--------|--------|-----|-------------------------|-----------------------------|-----------------------------|-----------------------|--------------|------|-----------------------|--------------------------------|--------------------------------|-----------------------|
|        | HC     | ASD |                         | HC                          | ASD                         | <i>p</i> <sup>a</sup> | HC           | ASD  | <i>p</i> <sup>b</sup> | HC                             | ASD                            | <i>p</i> <sup>a</sup> |
| GU_1   | 39     | 23  | 9/12/2                  | 10.49±1.74<br>[8.06 13.80]  | 11.29±1.05<br>[9.22 13.13]  | .051                  | 18/21        | 20/3 | .001                  | 121.08±14.05<br>[95.00 149.00] | 117.61±13.98<br>[92.00 139.00] | .351                  |
| NYU_1  | 22     | 17  | 5/0/12                  | 9.68±3.78<br>[5.90 23.81]   | 10.43±6.94<br>[5.43 34.76]  | .669                  | 20/2         | 16/1 | .709                  | 116.27±14.48<br>[91.00 144.00] | 111.88±14.79<br>[87.00 138.00] | .358                  |
| TCD_1  | 18     | 12  | 3/9/0                   | 16.28±2.79<br>[12.00 20.00] | 14.75±3.54<br>[10.00 19.50] | .198                  | 18/0         | 12/0 | --                    | 120.11±10.60<br>[99.00 142.00] | 113.92±14.01<br>[83.00 139.00] | .179                  |
| UCLA_1 | 10     | 8   | 8/0/0                   | 9.93±2.15<br>[7.76 14.09]   | 12.85±1.80<br>[9.66 15.03]  | .007                  | 6/4          | 8/0  | .043                  | 117.80±14.14<br>[94.00 141.00] | 106.25±9.95<br>[93.00 118.00]  | .069                  |
| Total  | 89     | 60  | 25/21/14                | 11.40±3.59<br>[5.90 23.81]  | 11.95±4.33<br>[5.43 5.43]   | .402                  | 62/27        | 56/4 | .000                  | 119.33±13.47<br>[91.00 149.00] | 113.73±13.96<br>[83.00 139.00] | .016                  |

2 **Table S3 continued**

| Site               | ADOS_G, mean±SD [Range]     |                          |                           |                          |
|--------------------|-----------------------------|--------------------------|---------------------------|--------------------------|
|                    | ADOS_TOTAL                  | ADOS_COMM                | ADOS_SOCIAL               | ADOS_STEREO              |
| GU_1               | 10.53±4.79<br>[3.00 18.00]  | 3.00±1.45<br>[1.00 7.00] | 7.53±3.81<br>[2.00 14.00] | 1.79±1.72<br>[0.00 5.00] |
| NYU_1              | 8.64±2.21<br>[5.00 12.00]   | 2.14±1.10<br>[1.00 4.00] | 6.50±1.29<br>[4.00 8.00]  | 1.36±1.01<br>[0.00 4.00] |
| TCD_1              | 8.25±1.82<br>[7.00 12.00]   | 2.75±0.75<br>[2.00 4.00] | 5.50±1.62<br>[3.00 8.00]  | 0.17±0.58<br>[0.00 2.00] |
| UCLA_1             | 13.00±0.71<br>[12.00 14.00] | 3.80±0.84<br>[3.00 5.00] | 9.20±0.45<br>[9.00 10.00] | 3.20±1.64<br>[1.00 5.00] |
| Total <sup>c</sup> | 9.70±3.56<br>[3.00 18.00]   | 2.78±1.23<br>[1.00 7.00] | 6.92±2.75<br>[2.00 14.00] | 1.42±1.55<br>[0.00 5.00] |

1 Abbreviations. TDC, typically developing control; ADOS, Autism Diagnostic Observation Schedule; ADOS\_TOTAL, classic total ADOS score;  
2 ADOS\_COMM, communication total sub-score of the classic ADOS; ADOS\_SOCIAL, social total score of the classic ADOS; ADOS\_STEREO,  
3 stereotyped behaviors and restricted interests total sub-score of the classic ADOS. GU\_1, Georgetown University; NYU\_1, New York University Langone  
4 Medical Center: Sample 1; TCD\_1, Trinity Centre for Health Sciences; UCLA\_1, University of California Los Angeles.  
5 a, two sample Student's *t*-test with two tails; b,  $\chi^2$  test; c, 48 of 60 ASD subjects have ADOS data available; "--" indicates data unavailable.

6

1 **Table S4. Characteristics of human ADHD cohorts.**

| Site     | Number |      | Age, mean±SD [Range]        |                             |                      | Gender (M/F) |       |                      | FIQ, mean±SD [Range]           |                                |                      |
|----------|--------|------|-----------------------------|-----------------------------|----------------------|--------------|-------|----------------------|--------------------------------|--------------------------------|----------------------|
|          | HC     | ADHD | HC                          | ADHD                        | p-value <sup>a</sup> | HC           | ADHD  | p-value <sup>b</sup> | HC                             | ADHD                           | p-value <sup>a</sup> |
| KKI      | 45     | 15   | 10.50±1.28<br>[8.12 12.87]  | 10.76±1.55<br>[8.10 12.99]  | 0.522                | 25/20        | 7/8   | 0.55                 | 110.07±11.55<br>[85.00 134.00] | 109.27±13.84<br>[88.00 134.00] | 0.826                |
| OHSU     | 25     | 18   | 9.27±1.22<br>[7.58 11.92]   | 9.09±1.15<br>[7.42 11.83]   | 0.633                | 13/12        | 13/5  | 0.181                | 119.64±13.18<br>[98.00 144.00] | 107.00±13.88<br>[82.00 132.00] | 0.004                |
| Peking_1 | 57     | 20   | 11.12±1.61<br>[8.42 14.83]  | 11.35±2.35<br>[9.00 17.33]  | 0.627                | 16/41        | 16/4  | 0.000                | 118.23±13.85<br>[81.00 143.00] | 97.85±12.40<br>[81.00 128.00]  | 0.000                |
| Peking_2 | 22     | 27   | 11.53±1.85<br>[9.08 14.33]  | 12.69±1.76<br>[9.25 15.83]  | 0.030                | 22/0         | 27/0  | --                   | 121.45±13.68<br>[94.00 153.00] | 111.37±12.89<br>[86.00 135.00] | 0.011                |
| Peking_3 | 21     | 16   | 13.24±0.99<br>[11.25 14.92] | 13.40±1.33<br>[11.00 16.00] | 0.680                | 21/0         | 16/0  | --                   | 113.14±13.05<br>[84.00 135.00] | 102.06±10.42<br>[83.00 120.00] | 0.009                |
| Total    | 170    | 96   | 11.00±1.79<br>[7.58 14.92]  | 11.55±2.24<br>[7.42 17.33]  | 0.028                | 97/73        | 79/17 | 0.000                | 116.06±13.57<br>[81.00 153.00] | 105.85±13.52<br>[81.00 135.00] | 0.000                |

2 Abbreviations. TDC, typically developing control. KKI, Kennedy Krieger Institute; OHSU, Oregon Health & Science University; Peking, Peking

3 University.

4 a, two sample Student's *t*-test with two tails; b,  $\chi^2$  test; "--" indicates data unavailable.

1 **Table S5. Characteristics of human OCD cohorts.**

| Site   | Number |     | Age, mean±SD [Range]        |                              |                       | Gender (M/F) |       |                       | OCD, mean±SD |             |
|--------|--------|-----|-----------------------------|------------------------------|-----------------------|--------------|-------|-----------------------|--------------|-------------|
|        | HC     | OCD | HC                          | OCD                          | <i>p</i> <sup>a</sup> | HC           | OCD   | <i>p</i> <sup>b</sup> | Y-BOCS       | HAM-A       |
| ION    | 58     | 78  | 30.79±8.41<br>[21.00 62.00] | 31.04±8.94<br>[14.00 63.00]  | .871                  | 38/20        | 45/33 | .355                  | 30.12±6.77   | 17.92±10.27 |
| Ruijin | 21     | 14  | 30.81±5.84<br>[24.00 45.00] | 27.29±10.87<br>[16.00 46.00] | .221                  | 13/8         | 10/4  | .561                  | 24.29±5.50   | 15.50±9.67  |
| Total  | 79     | 92  | 30.80±7.77<br>[21.00 62.00] | 30.47±9.30<br>[14.00 14.00]  | .803                  | 51/28        | 55/37 | .521                  | 29.23±6.89   | 17.55±10.17 |

2 Abbreviations. OCD, Obsessive compulsive disorder; Y-BOCS, Yale-Brown Obsessive Compulsive Scale; HAM-A, Hamilton Anxiety Rating

3 Scale.

4 a, two sample Student's *t*-test with two tails; b,  $\chi^2$  test.

1 **Table S6. Imaging protocols for resting-state fMRI used in the present study.**

2 ABIDE-I ASD cohort.

| Parameter                   | Site            |           |                        |                          |           |                 |                          |                          |          |          |
|-----------------------------|-----------------|-----------|------------------------|--------------------------|-----------|-----------------|--------------------------|--------------------------|----------|----------|
|                             | KKI             | LEUVEN_1  | MAX_MUN                | PITT                     | SDSU      | TRINITY         | UCLA_1                   | UCLA_2                   | UM_1     | UM_2     |
| MRI Scanner                 | Philips Achieva | Philips   | Siemens Magnetom Verio | Siemens Magnetom Allegra | GE MR750  | Philips Achieva | Siemens Magnetom TrioTim | Siemens Magnetom TrioTim | GE Signa | GE Signa |
| Magnetic field strength (T) | 3               | 3         | 3                      | 3                        | 3         | 3               | 3                        | 3                        | 3        | 3        |
| Field of view (mm)          | 256             | 230       | 192                    | 200                      | 220       | 240             | 192                      | 192                      | 220      | 220      |
| Matrix                      | 84×81           | 64×64     | --                     | 64×64                    | 64×64     | 80×80           | 64×64                    | 64×64                    |          |          |
| Number of slices            | 47              | 32        | 28                     | 29                       |           | 38              | 34                       | 34                       | 40       | 40       |
| In-plane resolution (mm)    | 3.05×3.15       | 3.59×3.59 | 3.0×3.0                | 3.1×3.1                  | 3.4×3.4   | 3.0×3.0         | 3.0×3.0                  | 3.0×3.0                  | 3.4×3.4  | 3.4×3.4  |
| Slice thickness (mm)        | 3               | 4         | 4                      | 4                        | 3.4       | 3.5             | 4                        | 4                        | 3        | 3        |
| Slice gap (mm)              | 0               | 0         | --                     | 0                        | 0         | 0.35            | 0                        | 0                        | 0        | 0        |
| TR (ms)                     | 2500            | 1667      | 3000                   | 1500                     | 2000      | 2000            | 3000                     | 3000                     | 2000     | 2000     |
| TE (ms)                     | 30              | 33        | 30                     | 25                       | 30        | 28              | 28                       | 28                       | 30       | 30       |
| Total scan time (mm:ss)     | 6:40            | 7:06      | 6:06                   | 5:06                     | 6:10      | 5:06            | 6:06                     | 6:06                     | 10:00    | 10:00    |
| Flip angle                  | 75              | 90        | 80                     | 70                       | 90        | 90              | 90                       | 90                       | 90       | 90       |
| Slice acquisition order     | Ascending       | Ascending | --                     | Ascending                | Ascending | Ascending       | Ascending                | Ascending                | --       | --       |
| Eyes during scan            | Opened          | Opened    | Closed/Opened          | Closed                   | Opened    | Closed          | Opened                   | Opened                   | Opened   | Opened   |

3 KKI, Kennedy Krieger Institute; LEUVEN\_1, University of Leuven: Sample 1; MAX\_MUN, Ludwig Maximilians University Munich; PITT,

4 University of Pittsburgh School of Medicine; SDSU, San Diego State University; TRINITY, Trinity Centre for Health Sciences; UCLA\_1,

5 University of California Los Angeles: Sample 1; UCLA\_2, University of California Los Angeles: Sample 2; UM\_1, University of Michigan:

6 Sample 1; UM\_2, University of Michigan: Sample 2.

1 Table S6 continued.

2 ABIDE-II ASD cohort

| Parameter                   | Site         |                 |                 |                          |
|-----------------------------|--------------|-----------------|-----------------|--------------------------|
|                             | GU_1         | NYU_1           | TCD_1           | UCLA_1                   |
| MRI Scanner                 | Siemens Trio | Siemens Allegra | Philips Achieva | Siemens Magnetom TrioTim |
| Magnetic field strength (T) | 3            | 3               | 3               | 3                        |
| Field of view (mm)          | 192          | 192             | 240             | 192                      |
| Matrix                      | 64×64        | 64×64           | 80×80           | 64×64                    |
| Number of slices            | 43           | 33              | 37              | 34                       |
| In-plane resolution (mm)    | 3.0×3.0      | 3.0×3.0         | 3.0×3.0         | 3.0×3.0                  |
| Slice thickness (mm)        | 2.5          | 3               | 3.2             | 4                        |
| Slice gap (mm)              | 0.5          | 0               | 0.3             | 0                        |
| TR (ms)                     | 2000         | 2000            | 2000            | 3000                     |
| TE (ms)                     | 30           | 15              | 27              | 28                       |
| Total scan time (mm:ss)     | 5:14         | 6:00            | 7:06            | 6:06                     |
| Flip angle                  | 90           | 82              | 90              | 90                       |
| Slice acquisition order     | Ascending    | Ascending       | Ascending       | Ascending                |
| Eyes during scan            | Opened       | Opened          | Opened          | Opened                   |

3 GU\_1, Georgetown University; NYU\_1, New York University Langone Medical Center: Sample 1;

4 TCD\_1, Trinity Centre for Health Sciences; UCLA\_1, University of California Los Angeles.

5

6 ADHD cohort

| Parameter                   | Site         |                          |                          |                          |                          |
|-----------------------------|--------------|--------------------------|--------------------------|--------------------------|--------------------------|
|                             | KKI          | OHSU                     | Peking_1                 | Peking_2                 | Peking_3                 |
| MRI Scanner                 | Siemens Trio | Siemens Magnetom TrioTim | Siemens Magnetom TrioTim | Siemens Magnetom TrioTim | Siemens Magnetom TrioTim |
| Magnetic field strength (T) | 3            | 3                        | 3                        | 3                        | 3                        |
| Field of view (mm)          | 256          | 240                      | 200                      | 200                      | 200                      |
| Matrix                      | 84×81        | --                       | --                       | --                       | --                       |
| Number of slices            | 47           | 36                       | 33                       | 33                       | 33                       |
| In-plane resolution (mm)    | 3.05×3.15    | 3.8×3.8                  | 3.1×3.1                  | 3.1×3.1                  | 3.1×3.1                  |
| Slice thickness (mm)        | 3            | 3.8                      | 3.5                      | 3.5                      | 3.5                      |
| Slice gap (mm)              | 0            | --                       | --                       | --                       | --                       |
| TR (ms)                     | 2500         | 2000                     | 2000                     | 2000                     | 2000                     |
| TE (ms)                     | 30           | 30                       | 30                       | 30                       | 30                       |
| Total scan time (mm:ss)     | 6:40         | 3:32                     | 8:06                     | 8:06                     | 8:06                     |
| Flip angle                  | 75           | 90                       | 90                       | 90                       | 90                       |
| Slice acquisition order     | Ascending    | Ascending                | Ascending                | Ascending                | Ascending                |
| Eyes during scan            | Opened       | Opened                   | Opened/Closed            | Opened/Closed            | Opened/Closed            |

7 KKI, Kennedy Krieger Institute; OHSU, Oregon Health & Science University; Peking, Peking

8 University

1 **Table S7. Cortical and subcortical parcellation and abbreviations.**

| Lobes     | Number | Hemisphere | Number | Hemisphere | Abbreviation | Full name                               |
|-----------|--------|------------|--------|------------|--------------|-----------------------------------------|
| Occipital | 1      | L          | 2      | R          | V1           | Visual area 1 (primary visual cortex)   |
|           | 3      | L          | 4      | R          | V2           | Visual area 2 (secondary visual cortex) |
|           | 5      | L          | 6      | R          | VACv         | Anterior visual area, ventral part      |
|           | 7      | L          | 8      | R          | VACd         | Anterior visual area, dorsal part       |
| Parietal  | 9      | L          | 10     | R          | S1           | Primary somatosensory cortex            |
|           | 11     | L          | 12     | R          | S2           | Secondary somatosensory cortex          |
|           | 13     | L          | 14     | R          | mPC          | Medial parietal cortex                  |
|           | 15     | L          | 16     | R          | IPS          | Intraparietal cortex                    |
|           | 17     | L          | 18     | R          | IPL          | Inferior parietal cortex                |
|           | 19     | L          | 20     | R          | SPL          | Superior parietal cortex                |
| Temporal  | 21     | L          | 22     | R          | A1           | Primary auditory cortex                 |
|           | 23     | L          | 24     | R          | A2           | Secondary auditory cortex               |
|           | 25     | L          | 26     | R          | TCpol        | Temporal polar cortex                   |
|           | 27     | L          | 28     | R          | IT           | Inferior temporal cortex                |
|           | 29     | L          | 30     | R          | VTC          | Ventral temporal cortex                 |
|           | 31     | L          | 32     | R          | CTC          | Central temporal cortex                 |
|           | 33     | L          | 34     | R          | CTC          | Superior temporal cortex                |
|           | 35     | L          | 36     | R          | HC           | Hippocampus                             |
| PFC       | 37     | L          | 38     | R          | PHC          | Parahippocampal cortex                  |
|           | 39     | L          | 40     | R          | M1           | Primary motor cortex                    |
|           | 41     | L          | 42     | R          | vIPMC        | Ventrolateral premotor cortex           |
|           | 43     | L          | 44     | R          | dIPMC        | Dorsolateral premotor cortex            |
|           | 45     | L          | 46     | R          | mPMC         | Medial premotor cortex                  |
|           | 47     | L          | 48     | R          | FEF          | Frontal eye field                       |
|           | 49     | L          | 50     | R          | vIPFC        | Ventrolateral prefrontal cortex         |
|           | 51     | L          | 52     | R          | clPFC        | Centrolateral prefrontal cortex         |
|           | 53     | L          | 54     | R          | dIPFC        | Dorsolateral prefrontal cortex          |
|           | 55     | L          | 56     | R          | dmPFC        | Dorsomedial prefrontal cortex           |
| OFC       | 57     | L          | 58     | R          | mPFC         | Medial prefrontal cortex                |
|           | 59     | L          | 60     | R          | PFCpol       | Prefrontal polar cortex                 |
|           | 61     | L          | 62     | R          | iOFC         | Orbitoinferior prefrontal cortex        |
|           | 63     | L          | 64     | R          | mOFC         | Orbitomedial prefrontal cortex          |
| Cingulate | 65     | L          | 66     | R          | lOFC         | Orbitolateral prefrontal cortex         |
|           | 67     | L          | 68     | R          | sgACC        | Subgenual cingulate cortex              |
|           | 69     | L          | 70     | R          | PCC          | Posterior cingulate cortex              |
|           | 71     | L          | 72     | R          | rsCC         | Retrosplenial cingulate cortex          |
| Insula    | 73     | L          | 74     | R          | ACC          | Anterior cingulate cortex               |
|           | 75     | L          | 76     | R          | G            | Gustatory cortex                        |



|             |    |   |    |   |      |                   |
|-------------|----|---|----|---|------|-------------------|
|             | 77 | L | 78 | R | Ia   | Anterior insula   |
|             | 79 | L | 80 | R | Ip   | Posterior insula  |
| Subcortical | 81 | L | 82 | R | Amyg | Amygdala          |
|             | 83 | L | 84 | R | Cau  | Caudate           |
|             | 85 | L | 86 | R | Put  | Putamen           |
|             | 87 | L | 88 | R | Tha  | Thalamus          |
|             | 89 | L | 90 | R | HT   | Hypothalamus      |
|             | 91 | L | 92 | R | NAcc | Nucleus accumbens |
|             | 93 | L | 94 | R | GP   | Globus pallidus   |

---

1

1 **Table S8. Classification performance of classifiers based on different sets of core regions.**

|          | Data set used to identify core regions | ACC (%)<br>[95% CI]       | Sensitivity (%)<br>[95% CI] | Specificity (%)<br>[95% CI] | AUC   | <i>p</i>            |
|----------|----------------------------------------|---------------------------|-----------------------------|-----------------------------|-------|---------------------|
| ABIDE-I  | Monkey                                 | 82.14<br>[77.53%, 86.00%] | 79.70<br>[71.66%, 85.98%]   | 83.74<br>[77.78%, 88.40%]   | 0.884 | <0.001              |
|          | ABIDE-II                               | 61.31<br>[55.85%, 66.51%] | 56.39<br>[47.53%, 64.88%]   | 64.53<br>[57.49%, 71.02%]   | 0.644 |                     |
| ABIDE-II | Monkey                                 | 75.17<br>[67.30%, 81.71%] | 70.00<br>[56.63, 80.80%]    | 78.65<br>[68.43%, 86.35%]   | 0.769 | 0.003               |
|          | ABIDE-I                                | 60.40<br>[52.04%, 68.21%] | 53.33<br>[40.10%, 66.14%]   | 65.17<br>[54.26%, 74.76%]   | 0.611 |                     |
| OCD      | Monkey                                 | 78.36<br>[71.29%, 84,13%] | 73.91<br>[63.53%, 82.26%]   | 83.54<br>[73.14%, 90.61%]   | 0.848 | --                  |
|          | ABIDE-I                                | 69.59<br>[62.02%, 76.26%] | 63.04<br>[52.29%, 72.69%]   | 77.22<br>[66.15%, 85.59%]   | 0.790 | 0.044 <sup>a</sup>  |
|          | ABIDE-II                               | 60.23<br>[52.45%, 67.54%] | 57.61<br>[46.87%, 67.71%]   | 63.29<br>[51.64%, 73.64%]   | 0.674 | <0.001 <sup>b</sup> |
| ADHD     | Monkey                                 | 68.80<br>[62.80%, 74.24%] | 56.25<br>[45.76%, 66.23%]   | 75.88<br>[62.80%,81.96 %]   | 0.700 | --                  |
|          | ABIDE-I                                | 68.42<br>[62.41%, 73.89%] | 61.46<br>[50.94%, 71.05%]   | 72.35<br>[64.88%, 78.79%]   | 0.754 | 0.920 <sup>a</sup>  |
|          | ABIDE-II                               | 62.03<br>[55.88%, 67.83%] | 51.04<br>[40.69%, 61.31%]   | 68.24<br>[60.60%, 75.04%]   | 0.649 | 0.048 <sup>b</sup>  |

2 Comparisons between different classifiers were conducted using McNemar's test. <sup>a</sup> denotes the  
3 monkey-derived classifier in comparison with the ABIDE-I derived classifier. <sup>b</sup> denotes the monkey-  
4 derived classifier in comparison with the ABIDE-II derived classifier.

5 ACC, accuracy; AUC, area under the receiver operating characteristic curve.

6

1 **Table S9. Correlations between node strength and symptom severity in ASD and OCD cohorts.**

| Core region | ABIDE-II   |          |           |          | OCD      |          |          |          |
|-------------|------------|----------|-----------|----------|----------|----------|----------|----------|
|             | ADOS TOTAL |          | ADOS COMM |          | Y-BOCS   |          | HAM-A    |          |
|             | <i>r</i>   | <i>p</i> | <i>r</i>  | <i>p</i> | <i>r</i> | <i>p</i> | <i>r</i> | <i>p</i> |
| CTC.L       | -0.307     | .034     | -0.308    | .033     | -0.082   | .44      | -0.199   | .058     |
| STG.R       | -0.278     | .056     | -0.336    | .020     | -0.050   | .636     | -0.209   | .046     |
| vIPFC.R     | -0.282     | .052     | -0.333    | .021     | -0.217   | .038     | -0.209   | .046     |
| S1.R        | -0.294     | .043     | -0.315    | .029     | -0.132   | .208     | -0.124   | .237     |
| M1.R        | -0.284     | .050     | -0.264    | .070     | -0.114   | .277     | -0.166   | .113     |
| ACC.L       | -0.219     | .134     | -0.295    | .042     | -0.085   | .423     | -0.091   | .390     |
| cIPFC.R     | -0.138     | .351     | -0.242    | .098     | -0.134   | .204     | -0.165   | .117     |
| SPL.L       | -0.170     | .249     | -0.209    | .153     | -0.158   | .132     | -0.237   | .023     |
| dIPFC.R     | -0.226     | .123     | -0.291    | .045     | -0.182   | .083     | -0.091   | .387     |

2 CTC.L, left central temporal cortex; STG.R, right superior temporal cortex; vIPFC.R, right  
3 ventrolateral prefrontal cortex; S1.R, right primary somatosensory cortex; M1.R, right primary motor  
4 cortex; ACC.L, left anterior cingulate cortex; cIPFC.R, right centrolateral prefrontal cortex; SPL.L,  
5 left superior parietal cortex; dIPFC.R, right dorsolateral prefrontal cortex. ADOS, Autism Diagnostic  
6 Observation Schedule; ADOS COMM, communication total sub-score of the classic ADOS; Y-  
7 BOCS, Yale-Brown Obsessive Compulsive Scale; HAM-A, Hamilton Anxiety Rating Scale.  
8

1 **Table S10. Prediction of symptom severity using functional connections identified in the**  
 2 **classifier.**

| Data     | Core region | Predicted model                                                                           | $r^2$ | $r$   | $p$     |
|----------|-------------|-------------------------------------------------------------------------------------------|-------|-------|---------|
| ABIDE-II | STG.R       | $ADOS\ COMM = 3.84 - 1.64 \times (STG.R \sim IOFC.R)$                                     | 0.166 | 0.407 | 0.004*  |
|          | vIPFC.R     | $ADOS\ COMM = 3.96 - 2.06 \times (vIPFC.R \sim THa.R)$                                    | 0.191 | 0.437 | 0.002*  |
|          | S1.R        | $ADOS\ COMM = 3.21 - 1.51 \times (S1.R \sim dmPFC.L)$                                     | 0.164 | 0.405 | 0.004*  |
|          | ACC.L       | $ADOS\ COMM = 3.68 - 2.62 \times (ACC.L \sim STG.L)$<br>$+1.72 \times (ACC.L \sim mPC.L)$ | 0.226 | 0.475 | <0.001* |
|          | dIPFC.R     | $ADOS\ COMM = 4.12 - 1.77 \times (dIPFC.R \sim STG.L)$                                    | 0.171 | 0.413 | 0.004*  |
| OCD      | vIPFC.R     | $Y - BOCS = 31.86 - 5.07 \times (vIPFC.R \sim PFCpol.R)$                                  | 0.048 | 0.219 | 0.036*  |
|          | SPL.L       | $HAM - A = 23.19 - 9.06 \times (SPL.L \sim CTC.L)$                                        | 0.079 | 0.281 | 0.007*  |

3 CTC.L, left central temporal cortex; STG.R, right superior temporal cortex; vIPFC.R, right  
 4 ventrolateral prefrontal cortex; S1.R, right primary somatosensory cortex; ACC.L, left anterior  
 5 cingulate cortex; dmPFC.L, left dorsomedial prefrontal cortex; SPL.L, left superior parietal cortex;  
 6 dIPFC.R, right dorsolateral prefrontal cortex; mPC.L, left medial parietal cortex; IOFC.R, right lateral  
 7 orbitofrontal cortex; THa.R, right thalamus; PFCpol.R, right prefrontal polar cortex. \* indicates  $p <$   
 8 0.05, FDR corrected.
